# Supplementary material for: GNG2 acts as a tumor suppressor in breast cancer through stimulating MRAS signaling
Source: PubMed Central journal article supplement (PMC8943035; doi:10.1038/s41419-022-04690-3), 2022-03-23

Original western blots:

Fig. 4A

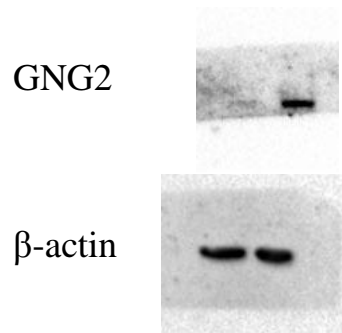

Fig.4B

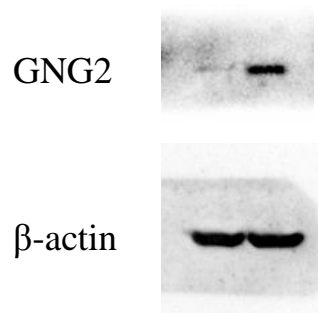

Fig.6B MCF-7

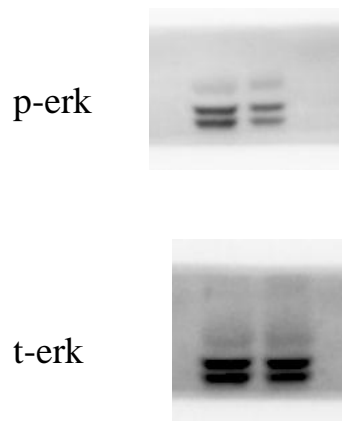

p-AKT

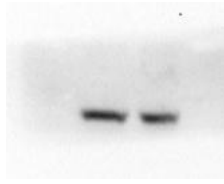

t-AKT

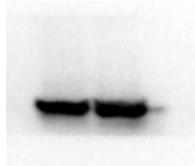

p-GSK3 $\beta$

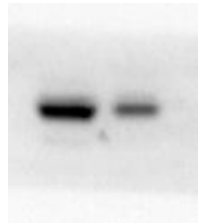

t-GSK3 $\beta$

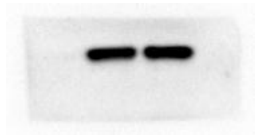

Fig.6B MDA-MB-231

p-erk

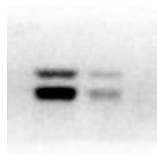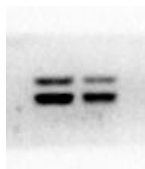

t-erk

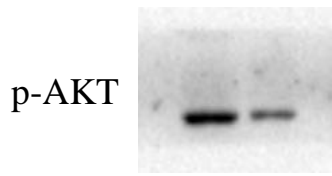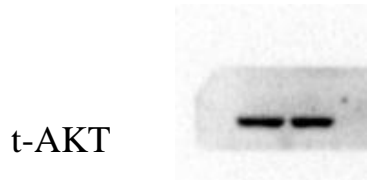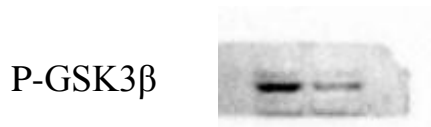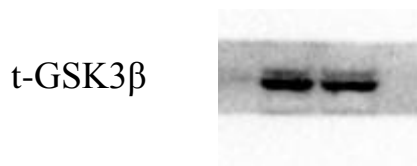

Fig.7D MCF-7

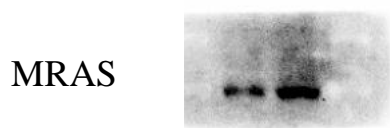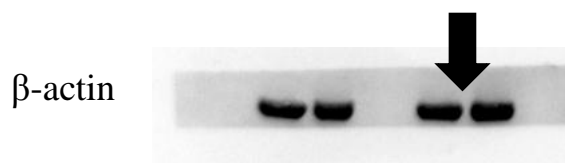

Fig.7D MDA-MB-231

MRAS

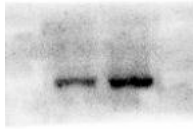

$\beta$ -actin

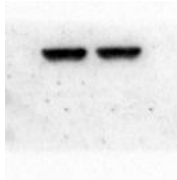

Fig.7E MCF-7

MRAS

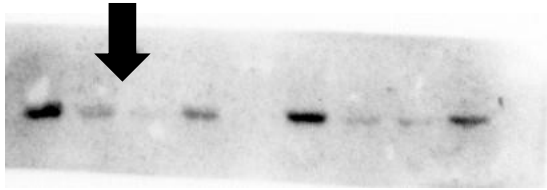

$\beta$ -actin

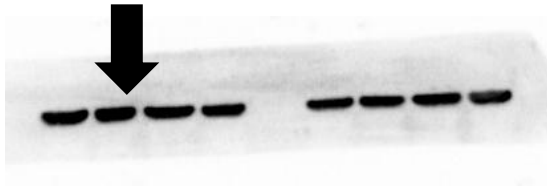

Fig.7E MDA-MB-231

MRAS

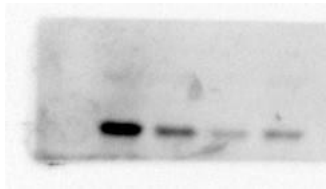

$\beta$ -actin

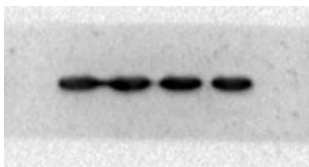

Fig.7F MCF-7

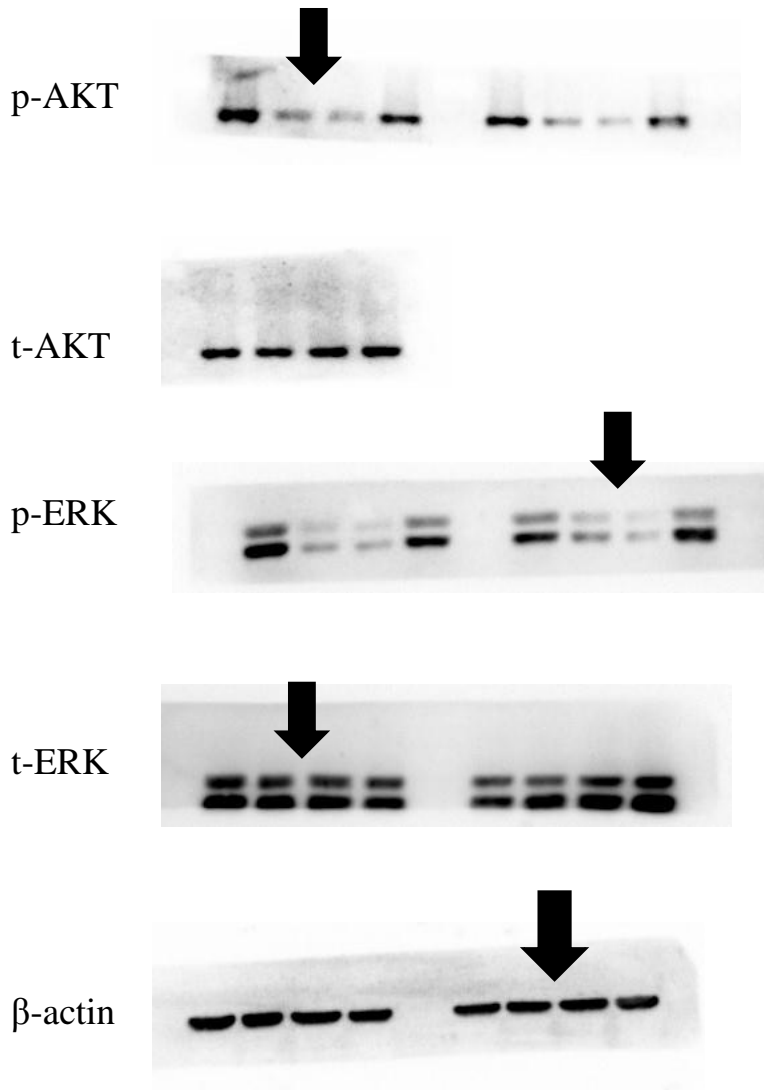

Fig.7F MDA-MB-231

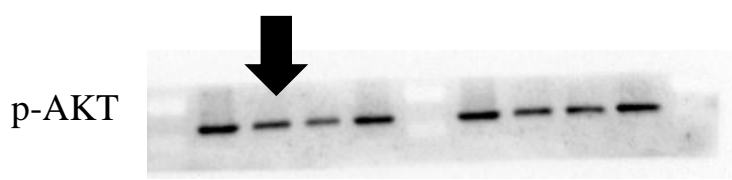

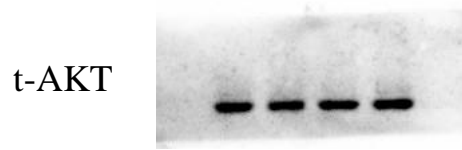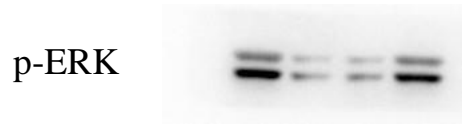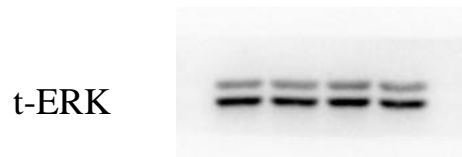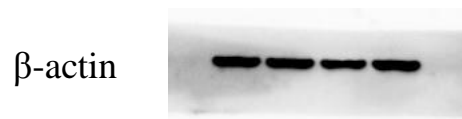

Fig.7H MCF-7

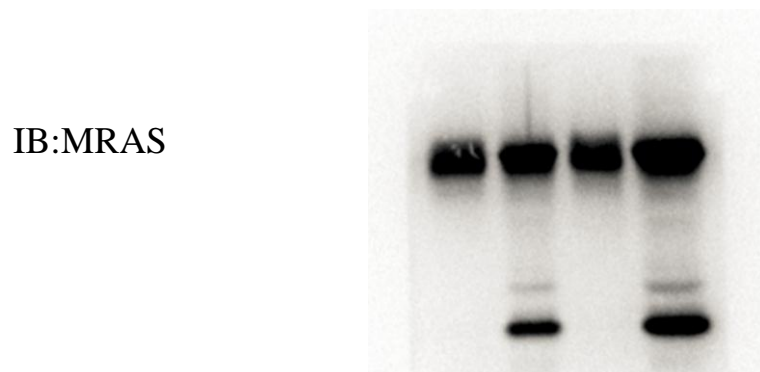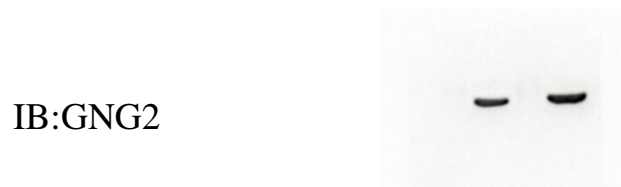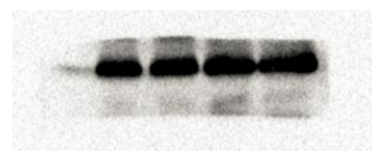

Input/IB:MRAS

Input/IB:GNG2

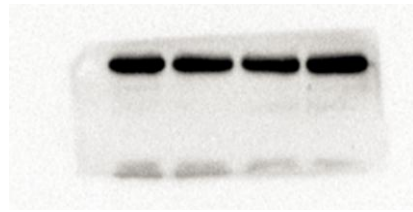

Supplementary material :  
figure S3A

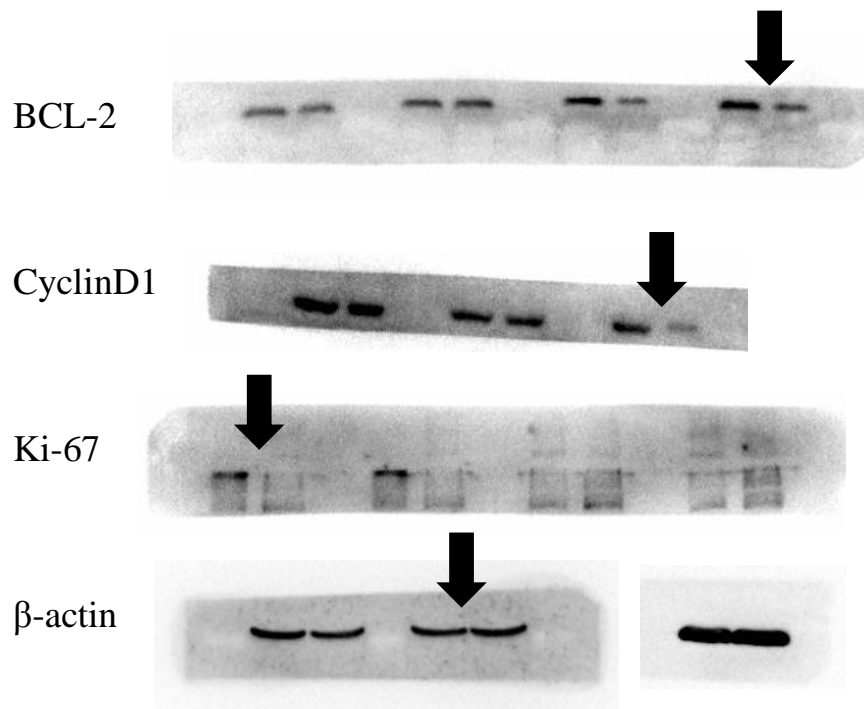

figure S3B

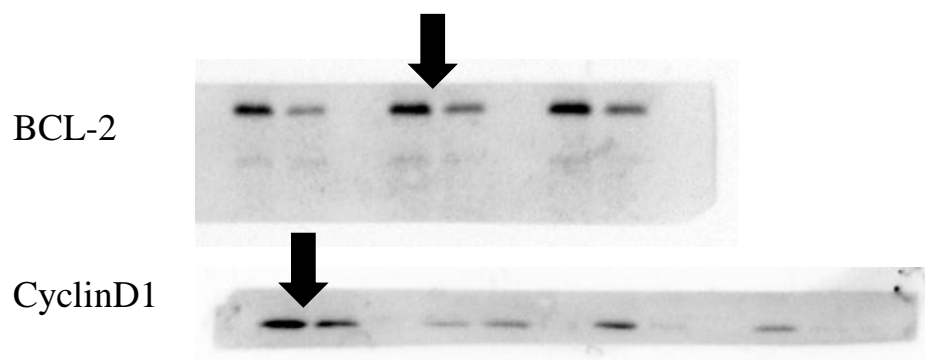

Ki-67

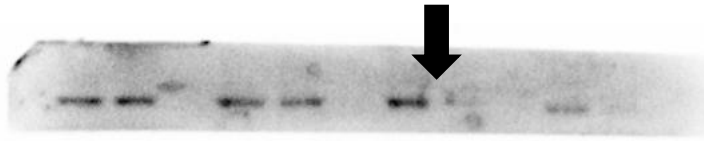

$\beta$ -actin

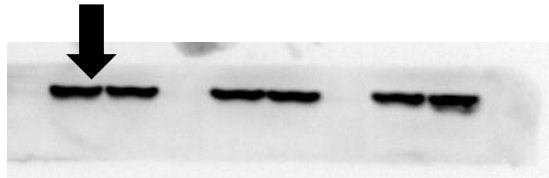

figure S4D MCF-7

BCL-2

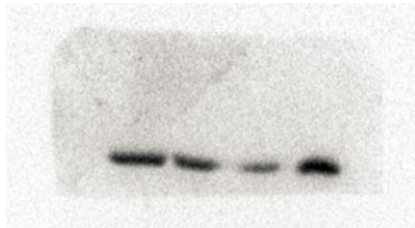

CyclinD1

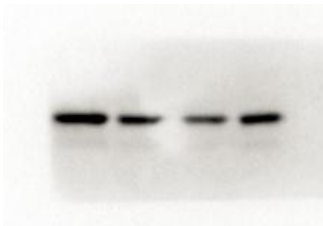

Ki67

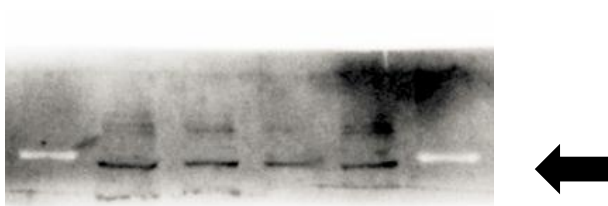



Actin

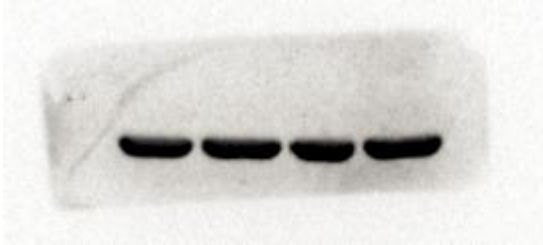

figure S4D MDA-MB-231

BCL2

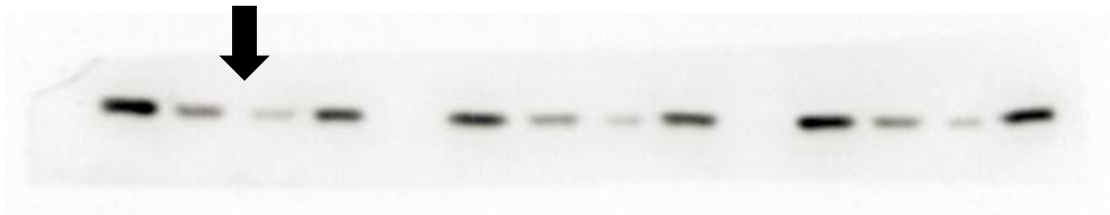

CyclinD1

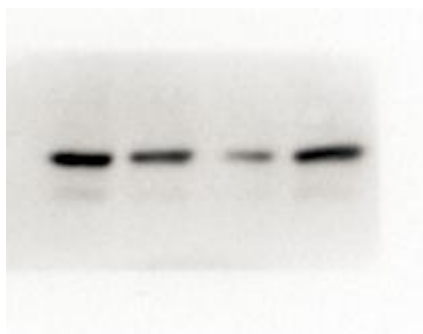

Ki67

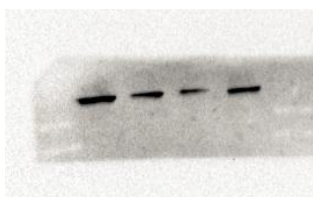

Actin

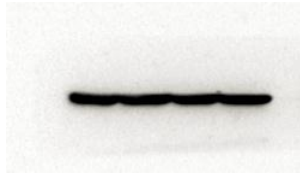

figure S4D 293T

IB:MRAS

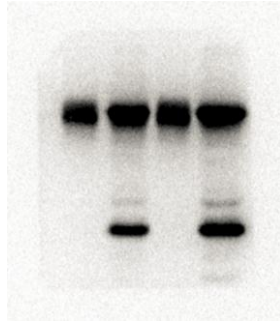

IB:GNG2

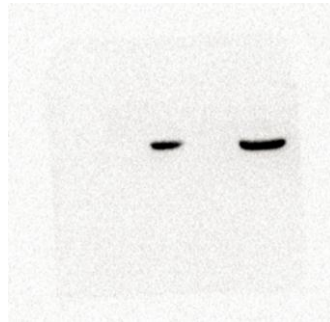

Input/IB:MRAS

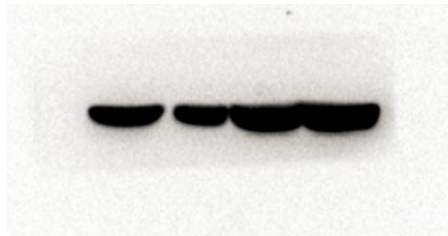

Input/IB:GNG2

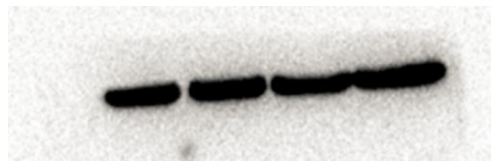

Supplement: 41419_2022_4690_MOESM2_ESM.pdf [file 41419_2022_4690_MOESM2_ESM.pdf]
